# Supplementary material
Source: MDPI journal article supplement (https://www.mdpi.com/2308-3417/8/3/54)
Supplement: s1 [file s1]

## Supplementary Materials

**Table S1.** Difference between sociodemographic variables and survival self-care practices.

| IADL                                                                                                     |     |      |      |         |         |      |         | BADL      |      |      |         |         |      |        |
|----------------------------------------------------------------------------------------------------------|-----|------|------|---------|---------|------|---------|-----------|------|------|---------|---------|------|--------|
| Frequency                                                                                                |     |      |      |         | Variety |      |         | Frequency |      |      |         | Variety |      |        |
|                                                                                                          | N   | Σ    | SD   | t       | Σ       | SD   | t       | N         | Σ    | SD   | t       | Σ       | SD   | t      |
| Participants                                                                                             | 101 | 3.55 | 1.33 |         | 3.20    | 1.04 |         | 105       | 2.56 | 0.48 |         | 4.03    | 0.66 |        |
| Age                                                                                                      |     |      |      |         |         |      |         |           |      |      |         |         |      |        |
| <75                                                                                                      | 51  | 3.54 | 1.33 | -.260   | 3.25    | 1.04 | .548    | 55        | 2.45 | 0.38 | -2.693* | 3.93    | .67  | -1.666 |
| >75                                                                                                      | 50  | 3.55 | 1.35 |         | 3.14    | 1.07 |         | 50        | 3.08 | 0.47 |         | 4.14    | .64  |        |
| Sex                                                                                                      |     |      |      |         |         |      |         |           |      |      |         |         |      |        |
| Male                                                                                                     | 13  | 2.41 | 1.46 | 3.355** | 2.43    | 1.02 | 3.084** | 17        | 2.47 | 0.48 | .951    | 3.94    | .66  | .597   |
| Female                                                                                                   | 88  | 4.06 | 1.26 |         | 3.32    | 1.00 |         | 88        | 2.58 | 0.43 |         | 4.05    | .66  |        |
| Education level                                                                                          |     |      |      |         |         |      |         |           |      |      |         |         |      |        |
| Basic                                                                                                    | 55  | 4.02 | 1.34 | .921    | 3.29    | 1.15 | .973    | 57        | 3.00 | 0.46 | .996    | 4.11    | .62  | 1.304  |
| Advanced                                                                                                 | 46  | 3.45 | 1.33 |         | 3.09    | .91  |         | 48        | 2.52 | 0.45 |         | 3.94    | .71  |        |
| Convivence                                                                                               |     |      |      |         |         |      |         |           |      |      |         |         |      |        |
| Alone                                                                                                    | 45  | 3.38 | 1.23 | -1.524  | 3.20    | 1.01 | .017    | 46        | 2.53 | 0.48 | -.561   | 4.09    | .63  | .808   |
| Accompanied                                                                                              | 56  | 4.07 | 1.40 |         | 3.19    | 1.09 |         | 59        | 2.58 | 0.41 |         | 3.98    | .68  |        |
| Confident                                                                                                |     |      |      |         |         |      |         |           |      |      |         |         |      |        |
| Yes                                                                                                      | 55  | 4.05 | 1.45 | 1.171   | 3.31    | 1.02 | 1.183   | 56        | 2.47 | 0.37 | -2.371* | 4.02    | .75  | -.187  |
| No                                                                                                       | 46  | 3.43 | 1.17 |         | 3.07    | 1.08 |         | 49        | 3.07 | 0.50 |         | 4.04    | .55  |        |
| *p< .05; **p<.005                                                                                        |     |      |      |         |         |      |         |           |      |      |         |         |      |        |
| Note: basic education = 8 or fewer years of schooling; advanced education =9 or more years of schooling. |     |      |      |         |         |      |         |           |      |      |         |         |      |        |

**Table S2.** Difference between sociodemographic variables and maintenance self-care practices.

|                                                                                                          | Physical  |      |      |         |         |      |       |    | Cognitive |      |        |      |         |       |    |      | Social    |       |      |      |         |    |      |      | Spiritual |      |      |       |         |  |  |  |
|----------------------------------------------------------------------------------------------------------|-----------|------|------|---------|---------|------|-------|----|-----------|------|--------|------|---------|-------|----|------|-----------|-------|------|------|---------|----|------|------|-----------|------|------|-------|---------|--|--|--|
|                                                                                                          | Frequency |      |      |         | Variety |      |       |    | Frequency |      |        |      | Variety |       |    |      | Frequency |       |      |      | Variety |    |      |      | Frequency |      |      |       | Variety |  |  |  |
|                                                                                                          | N         | Σ    | SD   | t       | Σ       | SD   | t     | N  | Σ         | SD   | t      | Σ    | SD      | t     | N  | Σ    | SD        | t     | Σ    | SD   | t       | N  | Σ    | SD   | t         | Σ    | SD   | t     |         |  |  |  |
| Total                                                                                                    | 98        | 2.43 | 1.26 |         | 1.35    | 0.56 |       | 63 | 1.57      | 1.02 |        | 1.83 | 0.94    |       | 43 | 1.22 | 0.36      |       | 1.09 | 0.29 |         | 13 | 1.07 | 0.43 |           | 1.33 | 0.65 |       |         |  |  |  |
| Age                                                                                                      |           |      |      |         |         |      |       |    |           |      |        |      |         |       |    |      |           |       |      |      |         |    |      |      |           |      |      |       |         |  |  |  |
| <75                                                                                                      | 52        | 3.00 | 1.35 | 2.253*  | 1.40    | .57  | 1.074 | 28 | 2.08      | 1.10 | 1.466  | 1.82 | .98     | .113  | 23 | 1.21 | 0.37      | -.108 | 1.04 | 0.21 | -.761   | 4  | 1.30 | 0.13 | 1.155     | 1.75 | 0.96 | 1.530 |         |  |  |  |
| >75                                                                                                      | 46        | 2.22 | 1.10 |         | 1.28    | .54  |       | 35 | 1.46      | 0.52 |        | 1.79 | .91     |       | 20 | 1.22 | 0.37      |       | 1.11 | 0.30 |         | 9  | 1.00 | 0.16 |           | 1.14 | 0.38 |       |         |  |  |  |
| Sex                                                                                                      |           |      |      |         |         |      |       |    |           |      |        |      |         |       |    |      |           |       |      |      |         |    |      |      |           |      |      |       |         |  |  |  |
| Male                                                                                                     | 17        | 3.43 | 1.52 | -       | 1.59    | .71  | -     | 10 | 2.27      | 1.41 | -1.706 | 2.30 | 1.25    | -     | 8  | 1.23 | 0.31      | -.075 | 1.13 | 0.35 | -.337   | 0  | 0    | 0    |           | 0.00 | 0.00 |       |         |  |  |  |
|                                                                                                          |           |      |      | 3.387** |         |      | 1.928 |    |           |      |        |      |         | 1.765 |    |      |           |       |      |      |         |    |      |      |           |      |      |       |         |  |  |  |
| Female                                                                                                   | 81        | 2.30 | 1.13 |         | 1.30    | .51  |       | 53 | 1.51      | 0.50 |        | 1.74 | .86     |       | 35 | 1.22 | 0.39      |       | 1.09 | 0.28 |         | 13 | 1.07 | 0.43 |           | 1.33 | 0.65 |       |         |  |  |  |
| Education level                                                                                          |           |      |      |         |         |      |       |    |           |      |        |      |         |       |    |      |           |       |      |      |         |    |      |      |           |      |      |       |         |  |  |  |
| Basic                                                                                                    | 55        | 2.45 | 1.25 | .372    | 1.34    | .58  | -.393 | 30 | 1.40      | 0.48 | -      | 1.70 | .88     | -.863 | 19 | 1.27 | 0.40      | .872  | 1.11 | 0.32 | .761    | 8  | 1.15 | 0.51 | .550      | 1.43 | 0.79 | .405  |         |  |  |  |
|                                                                                                          |           |      |      |         |         |      |       |    |           |      | 2.062* |      |         |       |    |      |           |       |      |      |         |    |      |      |           |      |      |       |         |  |  |  |
| Advanced                                                                                                 | 43        | 2.39 | 1.28 |         | 1.37    | .54  |       | 33 | 2.11      | 1.08 |        | 1.91 | .99     |       | 24 | 1.20 | 0.34      |       | 1.04 | 0.32 |         | 5  | 1.00 | 0.25 |           | 1.25 | 0.50 |       |         |  |  |  |
| Convivence                                                                                               |           |      |      |         |         |      |       |    |           |      |        |      |         |       |    |      |           |       |      |      |         |    |      |      |           |      |      |       |         |  |  |  |
| Alone                                                                                                    | 42        | 2.31 | 1.31 | -1.179  | 1.38    | .62  | .521  | 30 | 2.11      | 1.04 | 1.891  | 2.00 | .98     | 1.593 | 22 | 1.23 | 0.43      | .323  | 1.09 | 0.29 | .503    | 7  | 1.08 | 0.51 | -.130     | 1.17 | 0.41 | -     |         |  |  |  |
|                                                                                                          |           |      |      |         |         |      |       |    |           |      |        |      |         |       |    |      |           |       |      |      |         |    |      |      |           |      |      | 1.069 |         |  |  |  |
| Accompanied                                                                                              | 56        | 2.51 | 1.51 |         | 1.32    | .51  |       | 33 | 1.56      | 0.56 |        | 1.62 | .87     |       | 21 | 1.20 | 0.28      |       | 1.05 | 0.22 |         | 6  | 1.12 | 0.34 |           | 1.60 | 0.89 |       |         |  |  |  |
| Confident                                                                                                |           |      |      |         |         |      |       |    |           |      |        |      |         |       |    |      |           |       |      |      |         |    |      |      |           |      |      |       |         |  |  |  |
| Yes                                                                                                      | 56        | 2.50 | 1.50 | .978    | 1.38    | .53  | .841  | 35 | 2.08      | 1.08 | 1.510  | 1.91 | .99     | .857  | 27 | 1.28 | 0.40      | 1.437 | 1.08 | 0.27 | .172    | 6  | 1.52 | 0.52 | .130      | 1.60 | 0.89 | 1.069 |         |  |  |  |
| No                                                                                                       | 42        | 2.32 | 1.32 |         | 1.29    | .60  |       | 28 | 1.44      | 0.49 |        | 1.70 | .87     |       | 16 | 1.11 | 0.29      |       | 1.07 | 0.25 |         | 7  | 1.51 | 0.51 |           | 1.17 | 0.41 |       |         |  |  |  |
| *p< .05; **p<.005                                                                                        |           |      |      |         |         |      |       |    |           |      |        |      |         |       |    |      |           |       |      |      |         |    |      |      |           |      |      |       |         |  |  |  |
| Note: basic education = 8 or fewer years of schooling; advanced education =9 or more years of schooling. |           |      |      |         |         |      |       |    |           |      |        |      |         |       |    |      |           |       |      |      |         |    |      |      |           |      |      |       |         |  |  |  |

\*p< .05; \*\*p<.005

Note: basic education = 8 or fewer years of schooling; advanced education =9 or more years of schooling.

**Table S3.** Difference between sociodemographic variables and developmental self-care practices.

|                        | Technology |      |      |        |         |      |       | Reflection |      |      |          |         |      |   | New       |      |      |        |         |      |       |
|------------------------|------------|------|------|--------|---------|------|-------|------------|------|------|----------|---------|------|---|-----------|------|------|--------|---------|------|-------|
|                        | Frequency  |      |      |        | Variety |      |       | Frequency  |      |      |          | Variety |      |   | Frequency |      |      |        | Variety |      |       |
|                        | N          | Σ    | SD   | t      | Σ       | SD   | t     | N          | Σ    | SD   | t        | Σ       | SD   | t | N         | Σ    | SD   | t      | Σ       | SD   | t     |
| Participants           | 23         | 1.11 | 0.48 |        | 1.04    | 0.37 |       | 29         | 0.43 | 0.32 |          | 1.00    | 0.00 | - | 45        | 1.34 | 0.55 |        | 1.33    | 0.64 |       |
| <b>Age</b>             |            |      |      |        |         |      |       |            |      |      |          |         |      |   |           |      |      |        |         |      |       |
| <75                    | 11         | 0.58 | 0.58 | -1.368 | 1.09    | 0.30 | .585  | 12         | 0.41 | 0.22 | -.074    | 1.00    | 0.00 | - | 26        | 1.27 | 0.49 | -1.026 | 1.27    | 0.53 | -.783 |
| >75                    | 12         | 1.25 | 1.01 |        | 1.00    | 0.43 |       | 17         | 0.42 | 0.40 |          | 1.00    | 0.00 |   | 19        | 1.44 | 1.03 |        | 1.42    | 0.77 |       |
| <b>Sex</b>             |            |      |      |        |         |      |       |            |      |      |          |         |      |   |           |      |      |        |         |      |       |
| Male                   | 5          | 0.48 | 0.40 | 1.237  | 1.00    | 0.00 | .239  | 6          | 1.10 | 0.59 | -2.596** | 1.00    | 0.00 | - | 11        | 1.27 | 0.31 | .661   | 1.38    | 0.70 | .902  |
| Female                 | 18         | 1.17 | 0.49 |        | 1.06    | 0.42 |       | 23         | 0.35 | 0.16 |          | 1.00    | 0.00 |   | 34        | 1.37 | 1.01 |        | 1.18    | 0.41 |       |
| <b>Education level</b> |            |      |      |        |         |      |       |            |      |      |          |         |      |   |           |      |      |        |         |      |       |
| Basic                  | 10         | 1.06 | 0.31 | -.432  | 1.10    | 0.32 | .640  | 17         | 0.36 | 0.17 | -1.142   | 1.00    | 0.00 | - | 21        | 1.34 | 0.55 | -.005  | 1.29    | 0.72 | -.463 |
| Advanced               | 13         | 1.15 | 0.59 |        | 1.00    | 0.41 |       | 12         | 0.50 | 0.47 |          | 1.00    | 0.00 |   | 24        | 1.35 | 0.56 |        | 1.38    | 0.58 |       |
| <b>Convivence</b>      |            |      |      |        |         |      |       |            |      |      |          |         |      |   |           |      |      |        |         |      |       |
| Alone                  | 9          | 1.00 | 0.36 | -.804  | 1.00    | 0.50 | -.448 | 13         | 0.50 | 0.45 | 1.196    | 1.00    | 0.00 | - | 18        | 1.47 | 1.07 | 1.229  | 1.39    | 0.61 | .472  |
| Accompanied            | 14         | 1.17 | 0.53 |        | 1.07    | 0.27 |       | 16         | 0.35 | 0.14 |          | 1.00    | 0.00 |   | 27        | 1.26 | 0.46 |        | 1.30    | 0.67 |       |
| <b>Confident</b>       |            |      |      |        |         |      |       |            |      |      |          |         |      |   |           |      |      |        |         |      |       |
| Yes                    | 18         | 1.13 | 0.51 | .256   | 1.06    | 0.42 | .293  | 19         | 0.31 | 0.16 | -2.645*  | 1.00    | 0.00 | - | 36        | 1.37 | 0.58 | .562   | 1.31    | 0.67 | -.578 |
| No                     | 5          | 1.06 | 0.39 |        | 1.00    | 0.00 |       | 10         | 1.01 | 0.45 |          | 1.00    | 0.00 |   | 9         | 1.25 | 0.45 |        | 1.44    | 0.53 |       |

\*p&lt;.05; \*\*p&lt;.005

Note: basic education = 8 or fewer years of schooling; advanced education =9 or more years of schooling.
